# Supplementary material
Source: MDPI journal article supplement (https://www.mdpi.com/2306-5710/9/3/73)

**Table S1:** List of online retailers used during the market research analysis.

| Online Retailers           |                     |                           |                     |
|----------------------------|---------------------|---------------------------|---------------------|
| Amazon                     | GNC                 | Muscle Blaze              | Team Ready          |
| Beauty box Korea           | Gymgrossisten       | MyVegan                   | The Isopure Company |
| Behard                     | Holland and Barrett | No Pain No Gain Nutrition | TruSource           |
| Bevnet                     | Interspar           | NXT Nutrition             | Ubuy                |
| Biotech                    | Longos              | Powerfood                 | Upbeat              |
| BiPro                      | MaxiNutrition       | Premier Protein           | Vieve               |
| Bodiez                     | Mcgrocer            | Protein2O                 | Vital Proteins      |
| British online supermarket | Migros              | Protein pick and mix      | Vitamin UK          |
| Drink Trimino              | Multipower          | Prozis                    | Walmart             |
| Gatorade                   | Muscle and Strength | Reneva                    | Wowhydrate          |

**Figure S1:** Lumisizer graphs. Soft drink (SD), numbers 1-11 indicate product brand and the corresponding letter (a – d) shows different flavours of the same brand. An \* - carbonated. Table S1: List of retailers from the market research analysis of sourced protein soft drinks.

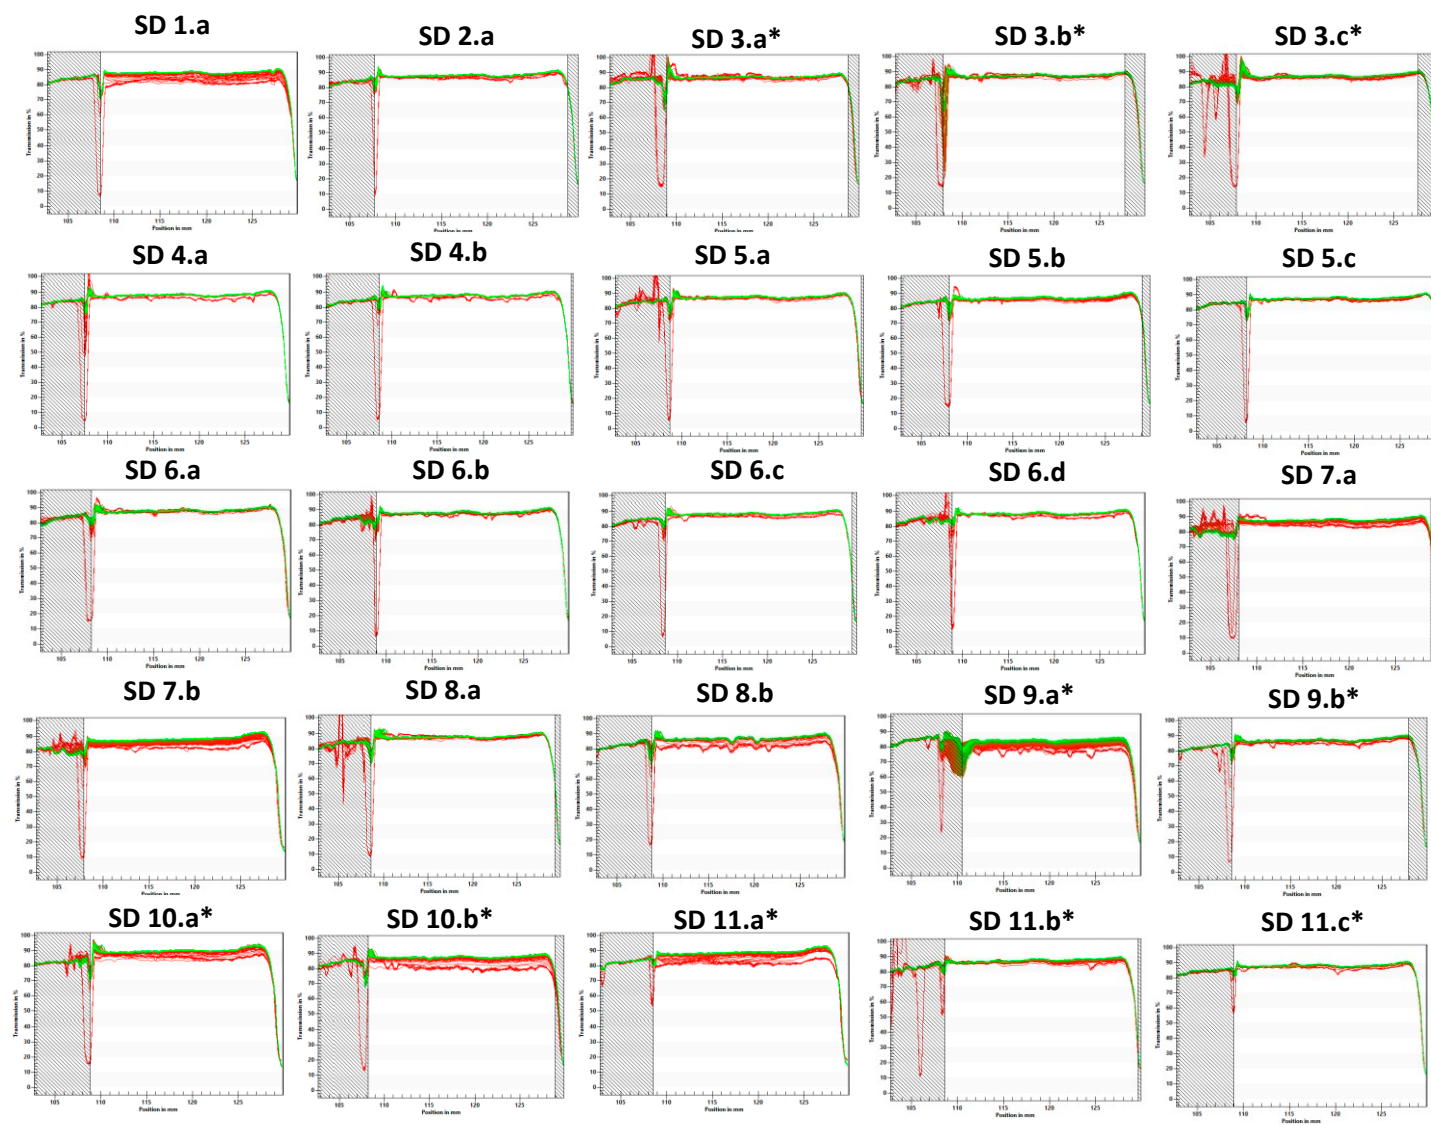

Supplement: s1 [file s1]
